# Supplementary material for: Protein profile changes during priming explants to embryogenic response in Coffea canephora: identification of the RPN12 proteasome subunit involved in the protein degradation
Source: PeerJ journal article supplement (doi:10.7717/peerj.18372), 2024-11-11
Supplement: RawCarrillo-Bermejo2Rev.zip [file MIQE_checklist_130524.xlsx]

## Sheet: Sheet1
ITEM TO CHECK	IMPORTANCE	CHECKLIST
EXPERIMENTAL DESIGN
Definition of experimental and control groups	E	100-108
Number within each group	E	102
Assay carried out by core lab or investigator's lab?	D	core lab
Acknowledgement of authors' contributions	D	NA
SAMPLE
Description	E	198-201
Volume/mass of sample processed	D	200
Microdissection or macrodissection	E	NA
Processing procedure	E	198-201
If frozen - how and how quickly?	E	198-201
If fixed - with what, how quickly?	E	NA
Sample storage conditions and duration (especially for FFPE samples)	E	NA
NUCLEIC ACID EXTRACTION
Procedure and/or instrumentation	E	199-200
Name of kit and details of any modifications	E	199
Source of additional reagents used	D	NA
Details of DNase or RNAse treatment	E	NA
Contamination assessment (DNA or RNA)	E	NA
Nucleic acid quantification (INTERVALOS )	E	205-207
Instrument and method	E	203-204
Purity (A260/A280)	D	206-207
Yield	D	207
RNA integrity method/instrument	E	205-206
RIN/RQI or Cq of 3' and 5' transcripts	E	NA
Electrophoresis traces	D	NA
Inhibition testing (Cq dilutions, spike or other)	E	219-220
REVERSE TRANSCRIPTION
Complete reaction conditions	E	208-217
Amount of RNA and reaction volume	E	208, 217
Priming oligonucleotide (if using GSP) and concentration	E	209
Reverse transcriptase and concentration	E	208
Temperature and time	E	210
Manufacturer of reagents and catalogue numbers	D	210
Cqs with and without RT	D*	NA
Storage conditions of cDNA	D	NA
qPCR TARGET INFORMATION
If multiplex, efficiency and LOD of each assay.	E	218-222
Sequence accession number	E	186, 188, 190
Location of amplicon	D	195-196
Amplicon length	E	195-196
In silico specificity screen (BLAST, etc)	E	189
Pseudogenes, retropseudogenes or other homologs?	D	NA
Sequence alignment	D	NA
Secondary structure analysis of amplicon	D	NA
Location of each primer by exon or intron (if applicable)	E	195
What splice variants are targeted?	E	NA
qPCR OLIGONUCLEOTIDES
Primer sequences	E	235-238
RTPrimerDB Identification Number	D	NA
Probe sequences	D**	NA
Location and identity of any modifications	E	NA
Manufacturer of oligonucleotides	D	192-193
Purification method	D	193-194
qPCR PROTOCOL
Complete reaction conditions	E	225-229
Reaction volume and amount of cDNA/DNA	E	225-226
Primer, (probe), Mg++ and dNTP concentrations	E	226-227
Polymerase identity and concentration	E	226
Buffer/kit identity and manufacturer	E	226
Exact chemical constitution of the buffer	D	NA
Additives (SYBR Green I, DMSO, etc.)	E	226
Manufacturer of plates/tubes and catalog number	D	NA
Complete thermocycling parameters	E	227-229
Reaction setup (manual/robotic)	D	manual
Manufacturer of qPCR instrument	E	223
qPCR VALIDATION
Evidence of optimisation (from gradients)	D	NA
Specificity (gel, sequence, melt, or digest)	E	229
For SYBR Green I, Cq of the NTC	E	NA
Standard curves with slope and y-intercept.	E	220-22
PCR efficiency calculated from slope	E	220-222
Confidence interval for PCR efficiency or standard error	D	NA
r2 of standard curve	E	220-222
Linear dynamic range	E	219-222
Cq variation at lower limit	E	220
Confidence intervals throughout range	D	NA
Evidence for limit of detection	E	NA
If multiplex, efficiency and LOD of each assay.	E	NA
DATA ANALYSIS
qPCR analysis program (source, version)	E	230-231
Cq method determination	E	234
Outlier identification and disposition	E	230-232
Results of NTCs	E	230-232
Justification of number and choice of reference genes	E	234-235
Description of normalisation method	E	234-235
Number and concordance of biological replicates	D	223
Number and stage (RT or qPCR) of technical replicates	E	224-225
Repeatability (intra-assay variation)	E	225
Reproducibility (inter-assay variation, %CV)	D	NA
Power analysis	D	NA
Statistical methods for result significance	E	240
Software (source, version)	E	240-241
Cq or raw data submission using RDML	D	NA
Table 1. MIQE checklist for authors, reviewers and editors. All essential information (E) must be submitted with the manuscript. Desirable
information (D) should be submitted if available. If using primers obtained from RTPrimerDB, information on qPCR target, oligonucleotides,
protocols and validation is available from that source.
*: Assessing the absence of DNA using a no RT assay is essential when first extracting RNA. Once the sample has been validated as
RDNA-free, inclusion of a no-RT control is desirable, but no longer essential.
**: Disclosure of the probe sequence is highly desirable and strongly encouraged. However, since not all commercial pre-designed assay
vendors provide this information, it cannot be an essential requirement. Use of such assays is advised against.
