# Supplementary material for: Protein profile changes during priming explants to embryogenic response in Coffea canephora: identification of the RPN12 proteasome subunit involved in the protein degradation
Source: PeerJ journal article supplement (doi:10.7717/peerj.18372), 2024-11-11
Supplement: RawCarrillo-Bermejo2Rev.zip [file RAW qpcr and somatic embryo qaunt2Rev.xlsx]

## Sheet: Samples Integrity and yield
Table. Nucleic acid quantification, yield and purity
	Concentration ng/μL	ratio 260/280	ratio 260/230
T1	261.4	1.91	1.77
T1.1	240.4	1.99	1.85
T1.2	207.3	1.9	1.69
T1.3	293.8	1.9	1.7
T1.4	288.2	2.01	1.77
T2	335.1	1.89	1.89
T2.1	353.4	1.91	1.79
T2.2	310.4	1.9	1.78
T2.3	315.4	1.93	1.87
T2.4	314.2	2.02	1.83
T1 = explant -AUX plus KIN
T2= explant +AUX plusKIN

## Sheet: Efficiency primer
	Tube	Ct 1	Ct 2	Avg Ct	Sample Quantity	Log (sample quantity)
	A	16.11	15.92	16.015	1	0
	B	19.81	19.13	19.47	0.1	-1
	C	23.29	23.35	23.32	0.01	-2
	D	26.39	26.54	26.465	0.001	-3
	E	25.88	25.31	25.595	0.0001	-4
					Dilution Factor	10
					Slope	-2.6155
					R Squared	0.892197
					Efficiency (%)	141.177
	Tube	Ct 1	Ct 2	Avg Ct	Sample Quantity	Log (sample quantity)
	A	17.83	18.19	18.01	1	0
	B	21.57	21.96	21.765	0.1	-1
	C	26.11	26.56	26.335	0.01	-2
	D	28.95	30.95	29.95	0.001	-3
	E	34.3	30.71	32.505	0.0001	-4
					Dilution Factor	10
					Slope	-3.7175
					R Squared	0.991426
					Efficiency (%)	85.7796

## Sheet: Delta-Delta cq
					S/trat (T1)
	Leaf	Day 0			Leaf
	T1 CcACTBct	T2 CcACTBct			ΔctTes(Day 0)	ΔΔctTes(Day0)	(Day0)2EXP(-ΔΔct)
	28.83	28.7			-3.2	-0.38	0.768438
	27.68	30.19			-2.11	0.71	1.6358
CcACT2	27.69	30.14			-2.29	0.53	1.44393
	27.54	28.76			-2.18	0.64	1.55833
	27.65	30.04			-2.36	0.46	1.37554
	28.71	29.3			-3.59	-0.77	0.586417
	28.76	29.96			-3.72	-0.9	0.535887
	27.65	28.98			-2.6	0.22	1.16473
	28.71	29.2			-3.33	-0.51	0.702222
	ControlCcRPN12ct	TraetmentCcRPN12ct		Average	-2.82	0	1.0857	0.118626		0.118626	0.197688
	25.63	26.42
	25.57	25.9		DESv	0.638553		0.439298	0.0732164		0.0732164	0.106368
CcRPN12	25.4	25.85								0.0732164	0.106368
	25.36	25.8			Con/treat (T2)
	25.29	25.8
	25.12	26.37			ΔctTes(T0)	ΔΔctTes(T0)	(T0)2EXP(-ΔΔct)
	25.04	25.58			-2.28	1.24444	2.36927
	25.05	26.16			-4.29	-0.765556	0.588227
	25.38	25.67			-4.29	-0.765556	0.588227
					-2.96	0.564444	1.47882
					-4.24	-0.715556	0.608971
					-2.93	0.594444	1.50989
					-4.38	-0.855556	0.552652
Average sample	Standard deviation sample	Average sample	Standard deviation sample		-2.82	0.704444	1.62952
28.0667	0.661085	29.6767	0.846188		-3.53	-0.00555556	0.996157
27.6267	0.646091	29.3667	0.642599
28.3733	0.626924	29.38	0.514198
				Average	-3.52444	0	1.14686	0.197688
25.5333	0.119304	26.0567	0.315647
25.2567	0.123423	25.99	0.32909	DESv	0.801017		0.63821	0.106368
25.1567	0.193477	25.8033	0.312143
						Ratio	1.05633

## Sheet: MetadaDataYieldEmbryos
Treatment T1		75 days								Tratamiento 2
Matraz	Stage	Explant 1	Explant 2	Explant 3	Explant 4	Explant 5	TOTAL	average	error	Matraz	Stage	Explant 1	Explant 2	Explant 3	Explant 4	Explant 5	TOTAL	average	error	T1	Average	DESV.EST	ERROR	T2	Average	DESV.EST	ERROR
1	Globular	89	90	70	104	68	421	84.2	15.1063	1	Globular	180	162	100	100	97	639	127.8	39.965	Globular	320.75	9.91211	4.43283	Globular	639.4	6.80441	3.04302
1	Heart	0	3	2	2	0	7	1.4	1.34164	1	Heart	10	4	4	4	2	24	4.8	3.03315	Heart	6.8	4.08656	1.82757	Heart	21.8	2.86356	1.28062
1	Torpedo	2	1	0		0	3	0.75	0.957427	1	Torpedo	1	2	3	2	2	10	2	0.707107	Torpedo	2.6	1.51658	0.678233	Torpedo	13.4	4.3359	1.93907
1	Cotyledonary	0	1	0		0	1	0.25	0.5	1	Cotyledonary	8	10	9	7	7	41	8.2	1.30384	Cotyledonary	1.6	1.34164	0.6	Cotyledonary	41.4	7.0214	3.14006
2	Globular	0	20	0	30	0	50	10	14.1421	2	Globular	130	160	150	98	100	638	127.6	28.2631
2	Heart	0	0	0	0	0	0	0	0	2	Heart	3	4	4	7	4	22	4.4	1.51658	T1	PromedioTotal	ERROR	T2	PromedioTotal	ERROR
2	Torpedo	0	0	0	0	0	0	0	0	2	Torpedo	1	3	3	5	6	18	3.6	1.94936	Globular	336.2	71.6529	Globular	639.4	3.04302
2	Cotyledonary	0	0	0	0	0	0	0	0	2	Cotyledonary	6	13	12	10	7	48	9.6	3.04959	Heart	6.8	1.82757	Corazón	21.8	1.28062
3	Globular	50	90	96	92	70	398	79.6	19.3598	3	Globular	145	126	120	110	130	631	126.2	12.9306	Torpedo	2.6	0.678233	Torpedo	13.4	1.93907
3	Heart	0	3	2	2	3	10	2	1.22474	3	Heart	3	2	5	2	5	17	3.4	1.51658	Cotyledonary	1.6	0.6	Cotiledonar	41.4	3.14006
3	Torpedo	0	0	1	2	0	3	0.6	0.894427	3	Torpedo	2	1	5	3	1	12	2.4	1.67332
3	Cotyledonary	0	0	0	2	1	3	0.6	0.894427	3	Cotyledonary	8	8	5	10	3	34	6.8	2.77489
4	Globular	40	90	90	89	94	403			1	Globular	180	162	100	100	97	639
4	Heart	2	3	2	0	0	7			1	Heart	10	4	4	4	2	24
4	Torpedo	2	1	0		0	3			1	Torpedo	1	0	4	2	2	9
4	Cotyledonary	0	1	0		0	1			1	Cotyledonary	8	10	5	7	5	35						T1		T2
5	Globular	89	67	70	93	90	409			2	Globular	100	160	125	150	115	650					Embryo per explant	64.15		127.88
5	Heart	0	3	2	2	3	10			2	Heart	3	4	4	7	4	22
5	Torpedo	0	0	2	0	2	4			2	Torpedo	2	3	3	4	6	18
5	Cotyledonary	0	0	0	2	1	3			2	Cotyledonary	6	15	12	9	7	49
Treatment T1		100 days								Tratamiento 2
Matraz	Stage	Explant 1	Explant 2	Explant 3	Explant 4	Explant 5	TOTAL	average	error	Matraz	Stage	Explant 1	Explant 2	Explant 3	Explant 4	Explant 5	TOTAL	average	error	T1	Average	DESV.EST	ERROR	T2	Average	DESV.EST	ERROR
1	Globular	50	90	50	88	45	323	64.6	22.3786	1	Globular	80	70	62	80	70	362	72.4	7.66812	Globular	243.6	8.66025	3.87298	Globular	361.8	4.60435	2.05913
1	Heart	4	10	12	15	4	45	9	4.89898	1	Heart	30	20	30	20	23	123	24.6	5.07937	Heart	26.2	19.9173	8.9073	Heart	119.2	13.8275	6.18385
1	Torpedo	5	8	4	2	2	21	4.2	2.48998	1	Torpedo	26	27	24	29	28	134	26.8	1.92354	Torpedo	12.2	11.1669	4.994	Torpedo	120.8	18.5796	8.30903
1	Cotyledonary	2	2	1	2	1	8	1.6	0.547723	1	Cotyledonary	38	42	35	38	40	193	38.6	2.60768	Cotyledonary	5.2	4.96991	2.22261	Cotyledonary	163.2	67.8063	30.3239
2	Globular	30	20	20	30	25	125	25	5	2	Globular	60	75	88	73	68	364	72.8	10.2811
2	Heart	3	4	2	1	1	11	2.2	1.30384	2	Heart	32	20	24	28	26	130	26	4.47214
2	Torpedo	0	0	0	0	0	0	0	0	2	Torpedo	22	28	24	28	24	126	25.2	2.68328
2	Cotyledonary	0	0	0	0	0	0	0	0	2	Cotyledonary	40	37	42	35	38	192	38.4	2.70185
3	Globular	39	89	56	79	75	338	67.6	19.97	3	Globular	88	65	73	68	65	359	71.8	9.62808
3	Heart	0	3	4	10	15	32	6.4	6.02495	3	Heart	38	15	10	17	15	95	19	10.9316		48.72
3	Torpedo	0	6	2	3	8	19	3.8	3.19374	3	Torpedo	18	10	38	17	5	88	17.6	12.5817						72.36
3	Cotyledonary	0	1	2	4	4	11	2.2	1.78885	3	Cotyledonary	16	12	4	6	4	42	8.4	5.36656
4	Globular	10	20	30	30	19	109	21.8	8.43801	4	Globular	60	55	78	75	88	356	71.2	13.5167
4	Heart	0	0	0	0	0	0	0	0	4	Heart	20	25	30	26	24	125	25	3.60555
4	Torpedo	0	0	0	0	0	0	0	0	4	Torpedo	24	27	23	25	29	128	25.6	2.40832
4	Cotyledonary	0	0	0	0	0	0	0	0	4	Cotyledonary	38	44	40	36	40	198	39.6	2.96648
5	Globular	50	90	50	88	45	323	64.6	22.3786	5	Globular	68	73	79	85	63	368	73.6	8.70632
5	Heart	4	10	10	15	4	43	8.6	4.66905	5	Heart	20	24	20	27	32	123	24.6	5.07937
5	Torpedo	5	8	4	2	2	21	4.2	2.48998	5	Torpedo	25	27	23	25	28	128	25.6	1.94936
5	Cotyledonary	1	2	1	2	1	7	1.4	0.547723	5	Cotyledonary	35	42	38	36	40	191	38.2	2.86356
